# Supplementary material
Source: PubMed Central journal article supplement (PMC2853876)
Supplement: NIHMS115499-supplement-supplemental_figure_1.pdf [file NIHMS115499-supplement-supplemental_figure_1.pdf]

**A**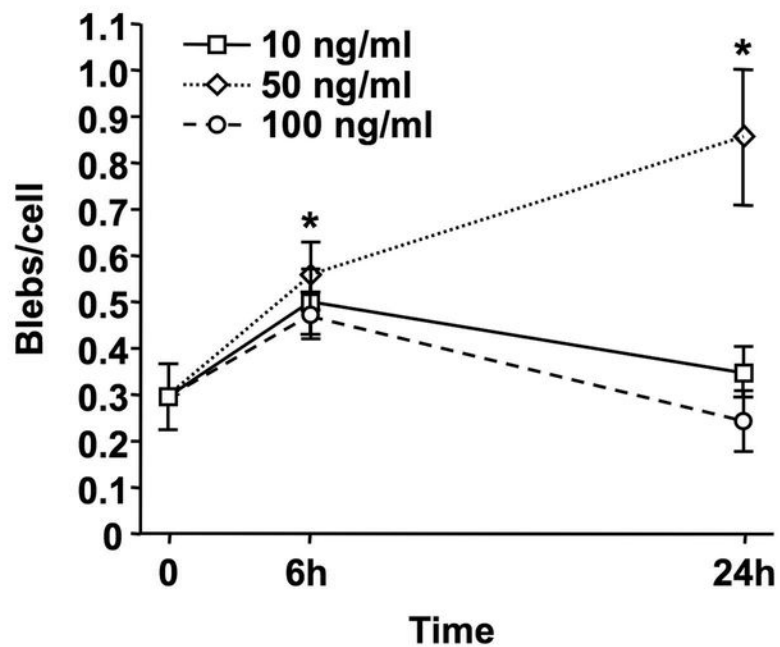**B**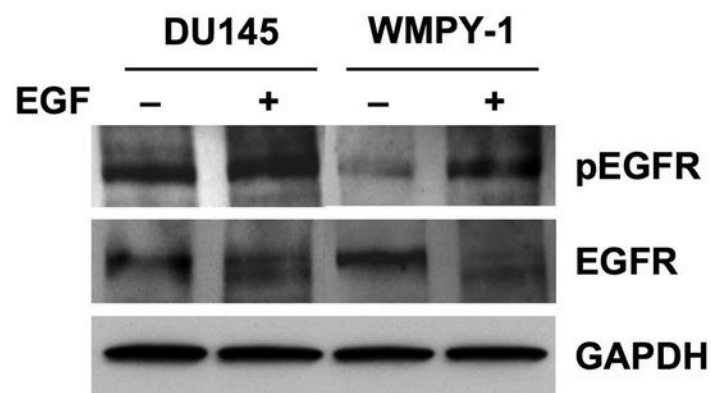

**Supplemental Figure 1, Di Vizio et al. (A)** Bleb formation was quantitatively assessed in DU145 cells treated with EGF at the indicated doses and times. **(B)** Whole cell lysates from DU145 and WMPY-1 cells +/- EGF were blotted with the indicated antibodies.
