# Supplementary material
Source: PubMed Central journal article supplement (PMC2853876)
Supplement: NIHMS115499-supplement-supplemental_figure_2.pdf [file NIHMS115499-supplement-supplemental_figure_2.pdf]

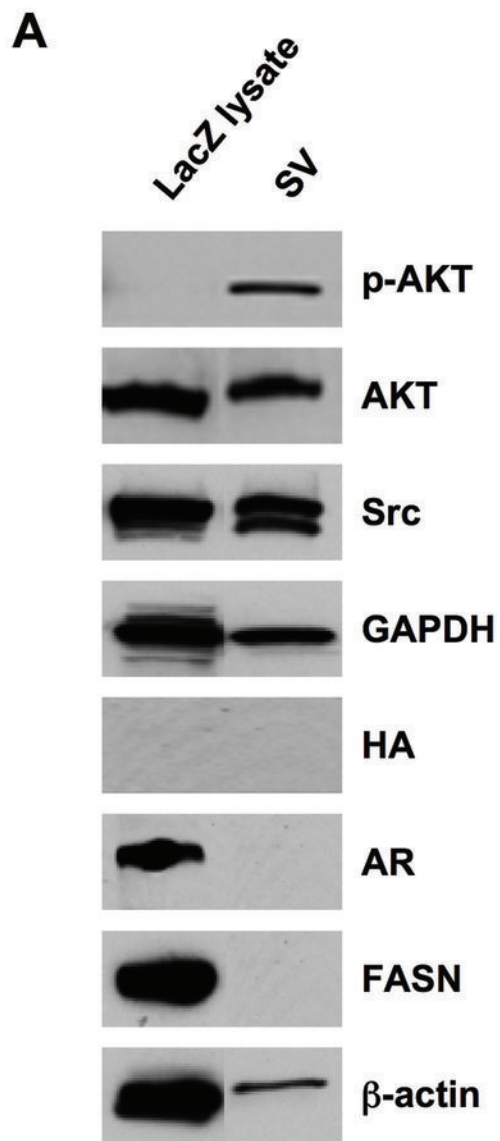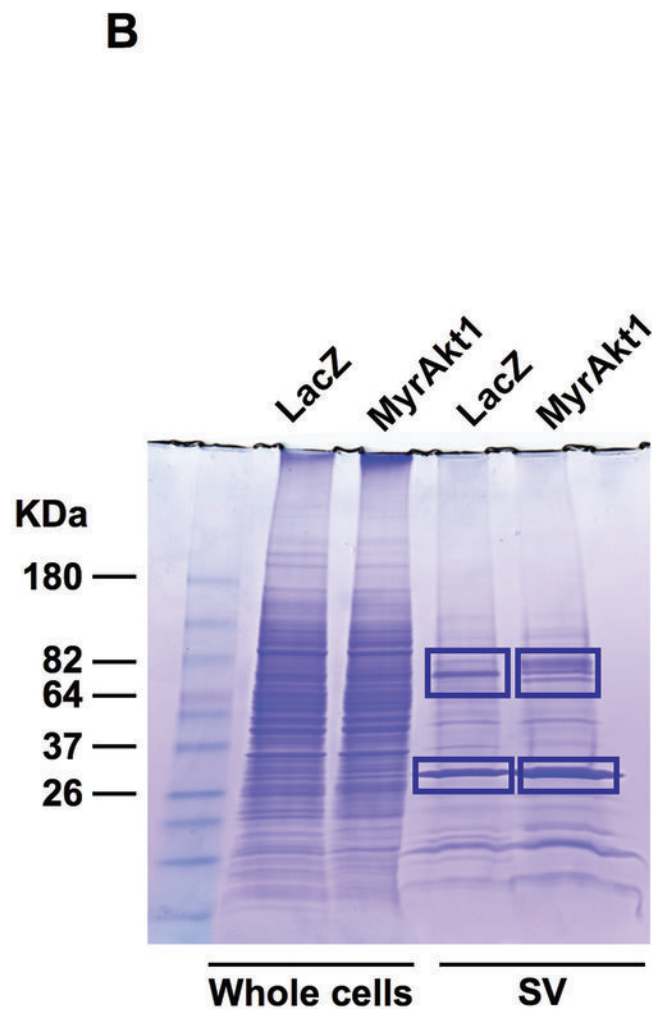

**Supplemental Figure 2, Di Vizio et al.** (A) Whole cell lysates and SV from LNCaP/LacZ cells treated with EGF were blotted with the indicated Abs. (B) Whole cell and SV proteins fractionated by SDS-PAGE and stained with Coomassie Blue. Boxes outline the two zones of abundant proteins that were subjected to mass spectrometry.
